# Supplementary material
Source: PubMed Central journal article supplement (PMC6498860)
Supplement: NIHMS1521535-supplement-8.pdf [file NIHMS1521535-supplement-8.pdf]

| Target       | Mutation                                                      | Organism | H3K79 methylation             | In vivo/in vitro        | Citation                                     |
|--------------|---------------------------------------------------------------|----------|-------------------------------|-------------------------|----------------------------------------------|
| H2B-Ub       | H2B K123R                                                     | Yeast    | abolished                     | <i>In vivo</i>          | (Briggs et al., 2002; Ng et al., 2002c)      |
|              | $\Delta$ Rad6                                                 | Yeast    | abolished                     | <i>in vivo</i>          | (Briggs et al., 2002; Ng et al., 2002c)      |
|              | Rnf20 (knockdown)                                             | Human    | reduced                       | <i>in vivo</i>          | (Wang et al., 2013)                          |
|              | Rnf20 (overexpression)                                        | Human    | increased                     | <i>in vivo</i>          | (Zhu et al., 2005)                           |
| Ubiquitin    | L71A, L73A                                                    | Human    | decreased                     | <i>in vitro</i>         | (Holt et al., 2015)                          |
|              | L8,I44A                                                       | Human    | no effect                     | <i>in vitro</i>         | (McGinty et al., 2009)                       |
| Acidic patch | H2A E64A                                                      | Human    | no effect                     | <i>in vitro</i>         | (McGinty et al., 2009)                       |
|              | H2A E68A                                                      | Human    | no effect                     | <i>in vitro</i>         | (McGinty et al., 2009)                       |
| H4 tail      | R19A, R17A                                                    | Human    | Severe reduction              | <i>in vitro</i>         | (McGinty et al., 2009)                       |
|              | R19A, R17A                                                    | Yeast    | abolished                     | <i>in vivo/in vitro</i> | (Altaf et al., 2007; Fingerman et al., 2007) |
|              | R19E, R17E                                                    | Yeast    | abolished                     | <i>in vivo</i>          | (Fingerman et al., 2007)                     |
|              | R17A                                                          | Yeast    | Abolished di- and tri- methyl | <i>in vivo</i>          | (Fingerman et al., 2007)                     |
|              | R17E                                                          | Yeast    | abolished                     | <i>in vivo</i>          | (Fingerman et al., 2007)                     |
|              | R17K                                                          | Yeast    | no effect                     | <i>in vivo</i>          | (Fingerman et al., 2007)                     |
|              | R19A                                                          | Yeast    | Abolished di- and tri- methyl | <i>in vivo</i>          | (Fingerman et al., 2007)                     |
|              | R19E                                                          | Yeast    | Abolished di- and tri- methyl | <i>in vivo</i>          | (Fingerman et al., 2007)                     |
|              | R19K                                                          | Yeast    | no effect                     | <i>in vivo</i>          | (Fingerman et al., 2007)                     |
|              | $\Delta$ 17-20                                                | Yeast    | abolished                     | <i>in vivo/in vitro</i> | (Fingerman et al., 2007)                     |
| Dot1L        | H4 R17 binding pocket E374A, E374Q                            | Yeast    | abolished                     | <i>in vitro</i>         | (Sawada et al., 2004)                        |
|              | H4 R17 binding pocket Y350F                                   | Yeast    | severe reduction              | <i>in vitro</i>         | (Sawada et al., 2004)                        |
|              | Lysine tunnel, W543A                                          | Yeast    | abolished                     | <i>in vitro</i>         | (Sawada et al., 2004)                        |
|              | Lysine tunnel, W543F                                          | Yeast    | abolished                     | <i>in vitro</i>         | (Sawada et al., 2004)                        |
|              | Lysine Tunnel N241D, N241D                                    | Human    | abolished                     | <i>in vitro</i>         | (Min et al., 2003)                           |
|              | Y312A                                                         | Human    | abolished                     | <i>in vitro</i>         | (Min et al., 2003)                           |
|              | C-term Ub-binding helix ( $\Delta$ EDVDE)                     | Yeast    | abolished                     | <i>in vivo/in vitro</i> | (Fingerman et al., 2007)                     |
|              | SAM binding site G163R/S164C/G165R                            | human    | abolished                     | <i>in vivo/in vitro</i> | (Feng et al., 2002; Kim et al., 2012)        |
|              | SAM binding site E422D                                        | Yeast    | abolished                     | <i>in Vitro</i>         | (Sawada et al., 2004)                        |
|              | DNA binding deletion Dot1L(1-351), Dot1L(1-370), Dot1L(1-385) | Human    | abolished                     | <i>In vitro</i>         | (Feng et al., 2002; Min et al., 2003)        |
| siRNA        | human                                                         | reduced  | <i>In vivo</i>                | (Kim et al., 2012)      |                                              |

**Table S1: Published mutants and their effects on H3K79 methylation by Dot1L, Related to Figures 4-7**
