# Supplementary material
Source: PubMed Central journal article supplement (PMC6498860)

Active-state Dot1L  
+ Dot1L crystal structure

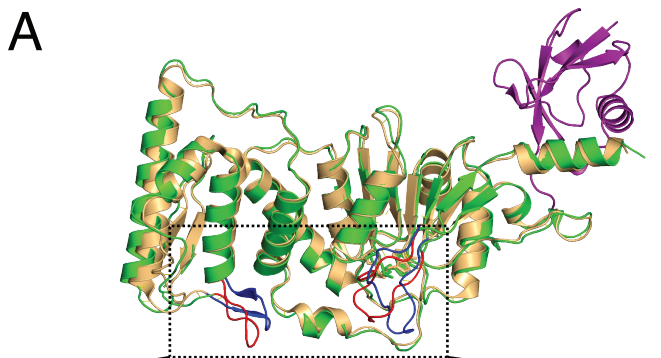

Active-state Dot1L  
+ poised-state Dot1L

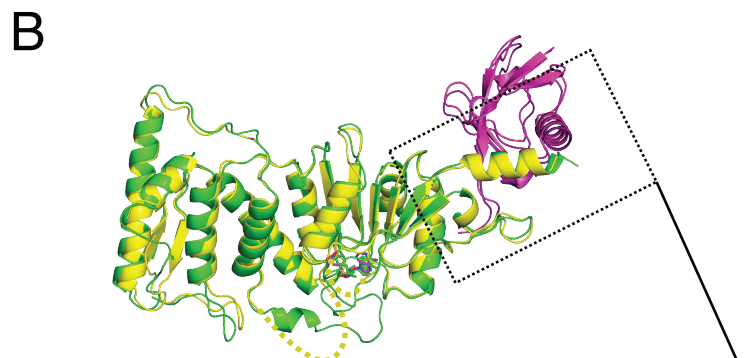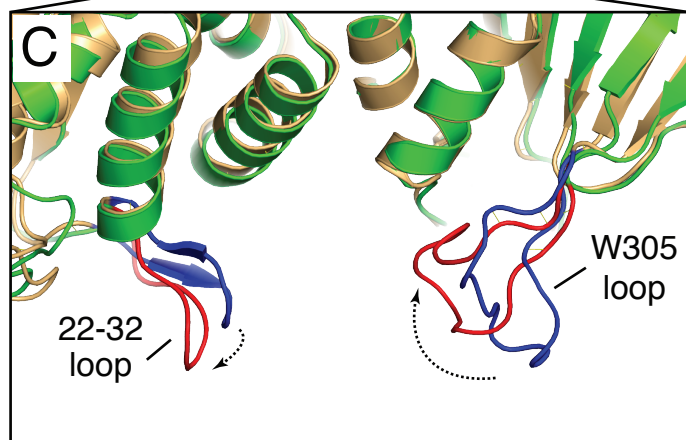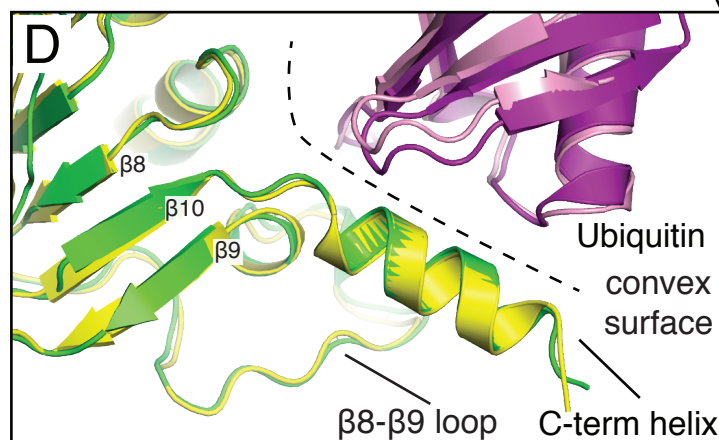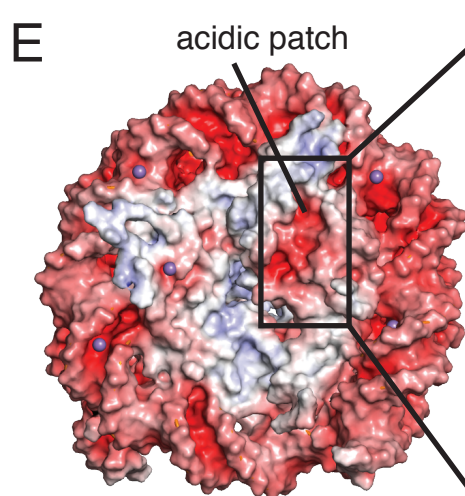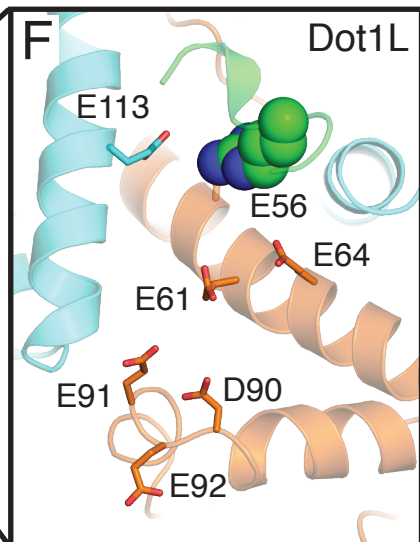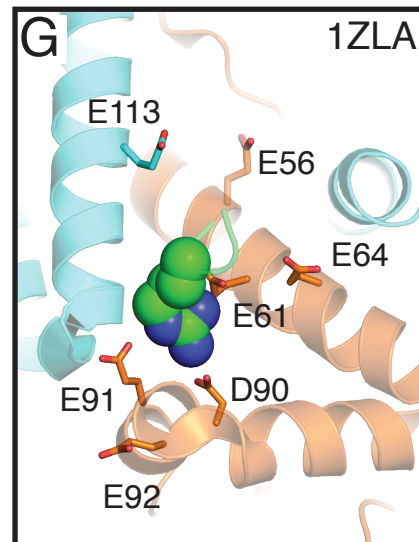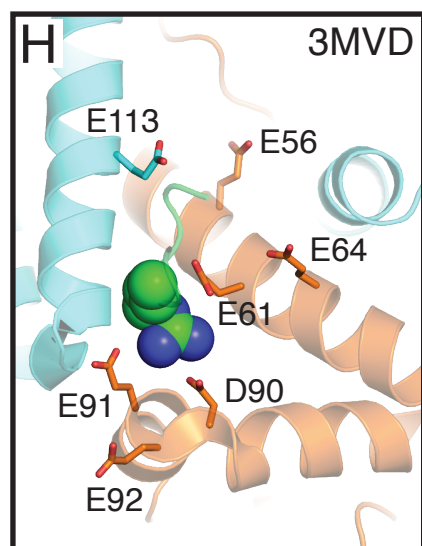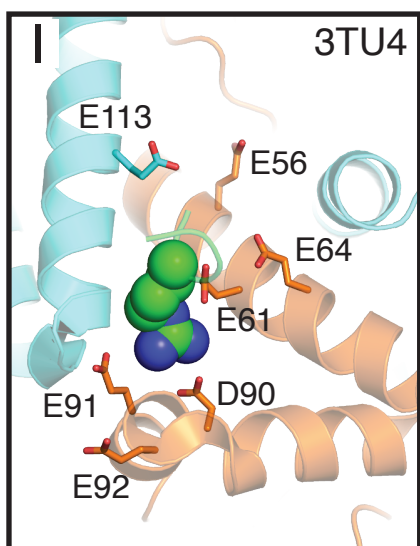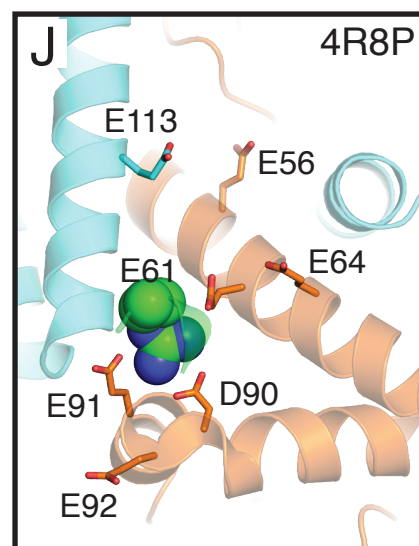

Supplement: NIHMS1521535-supplement-1.pdf [file NIHMS1521535-supplement-1.pdf]

A

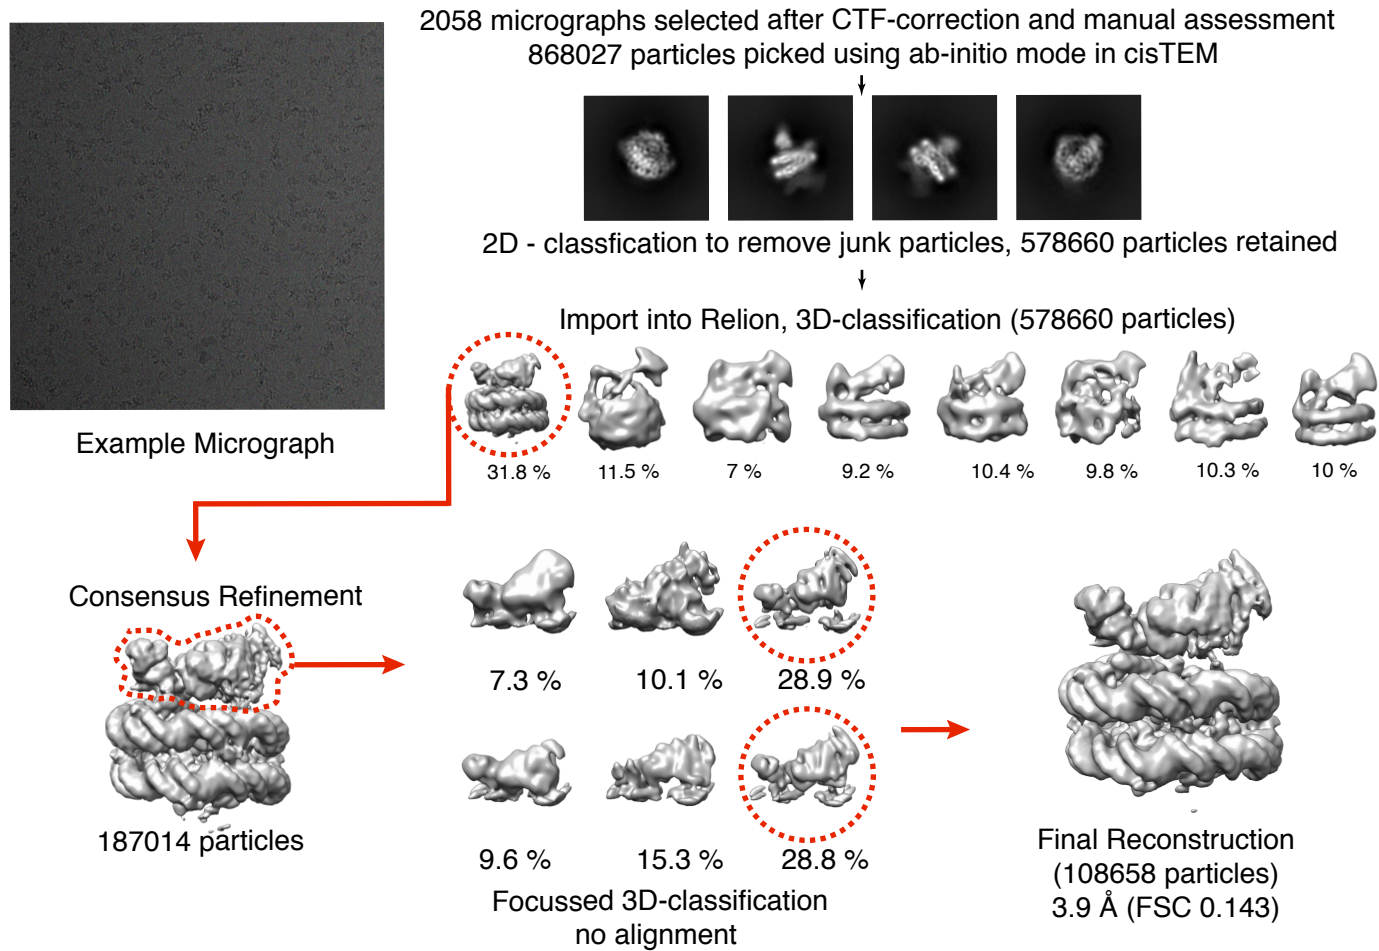

B

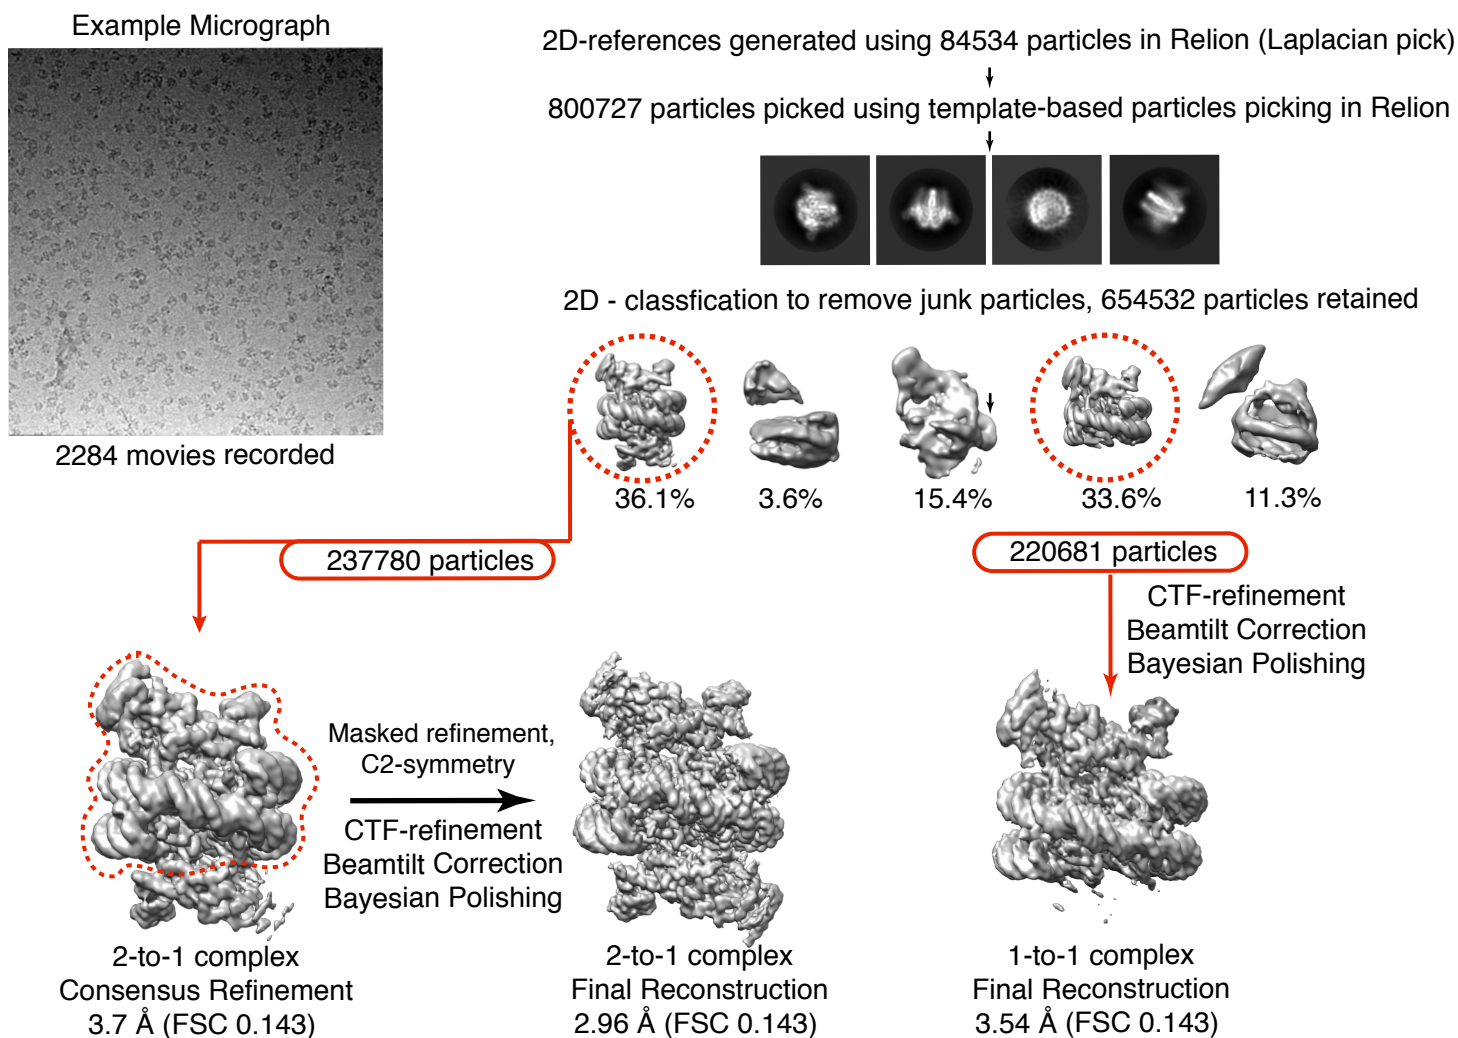

Supplement: NIHMS1521535-supplement-2.pdf [file NIHMS1521535-supplement-2.pdf]

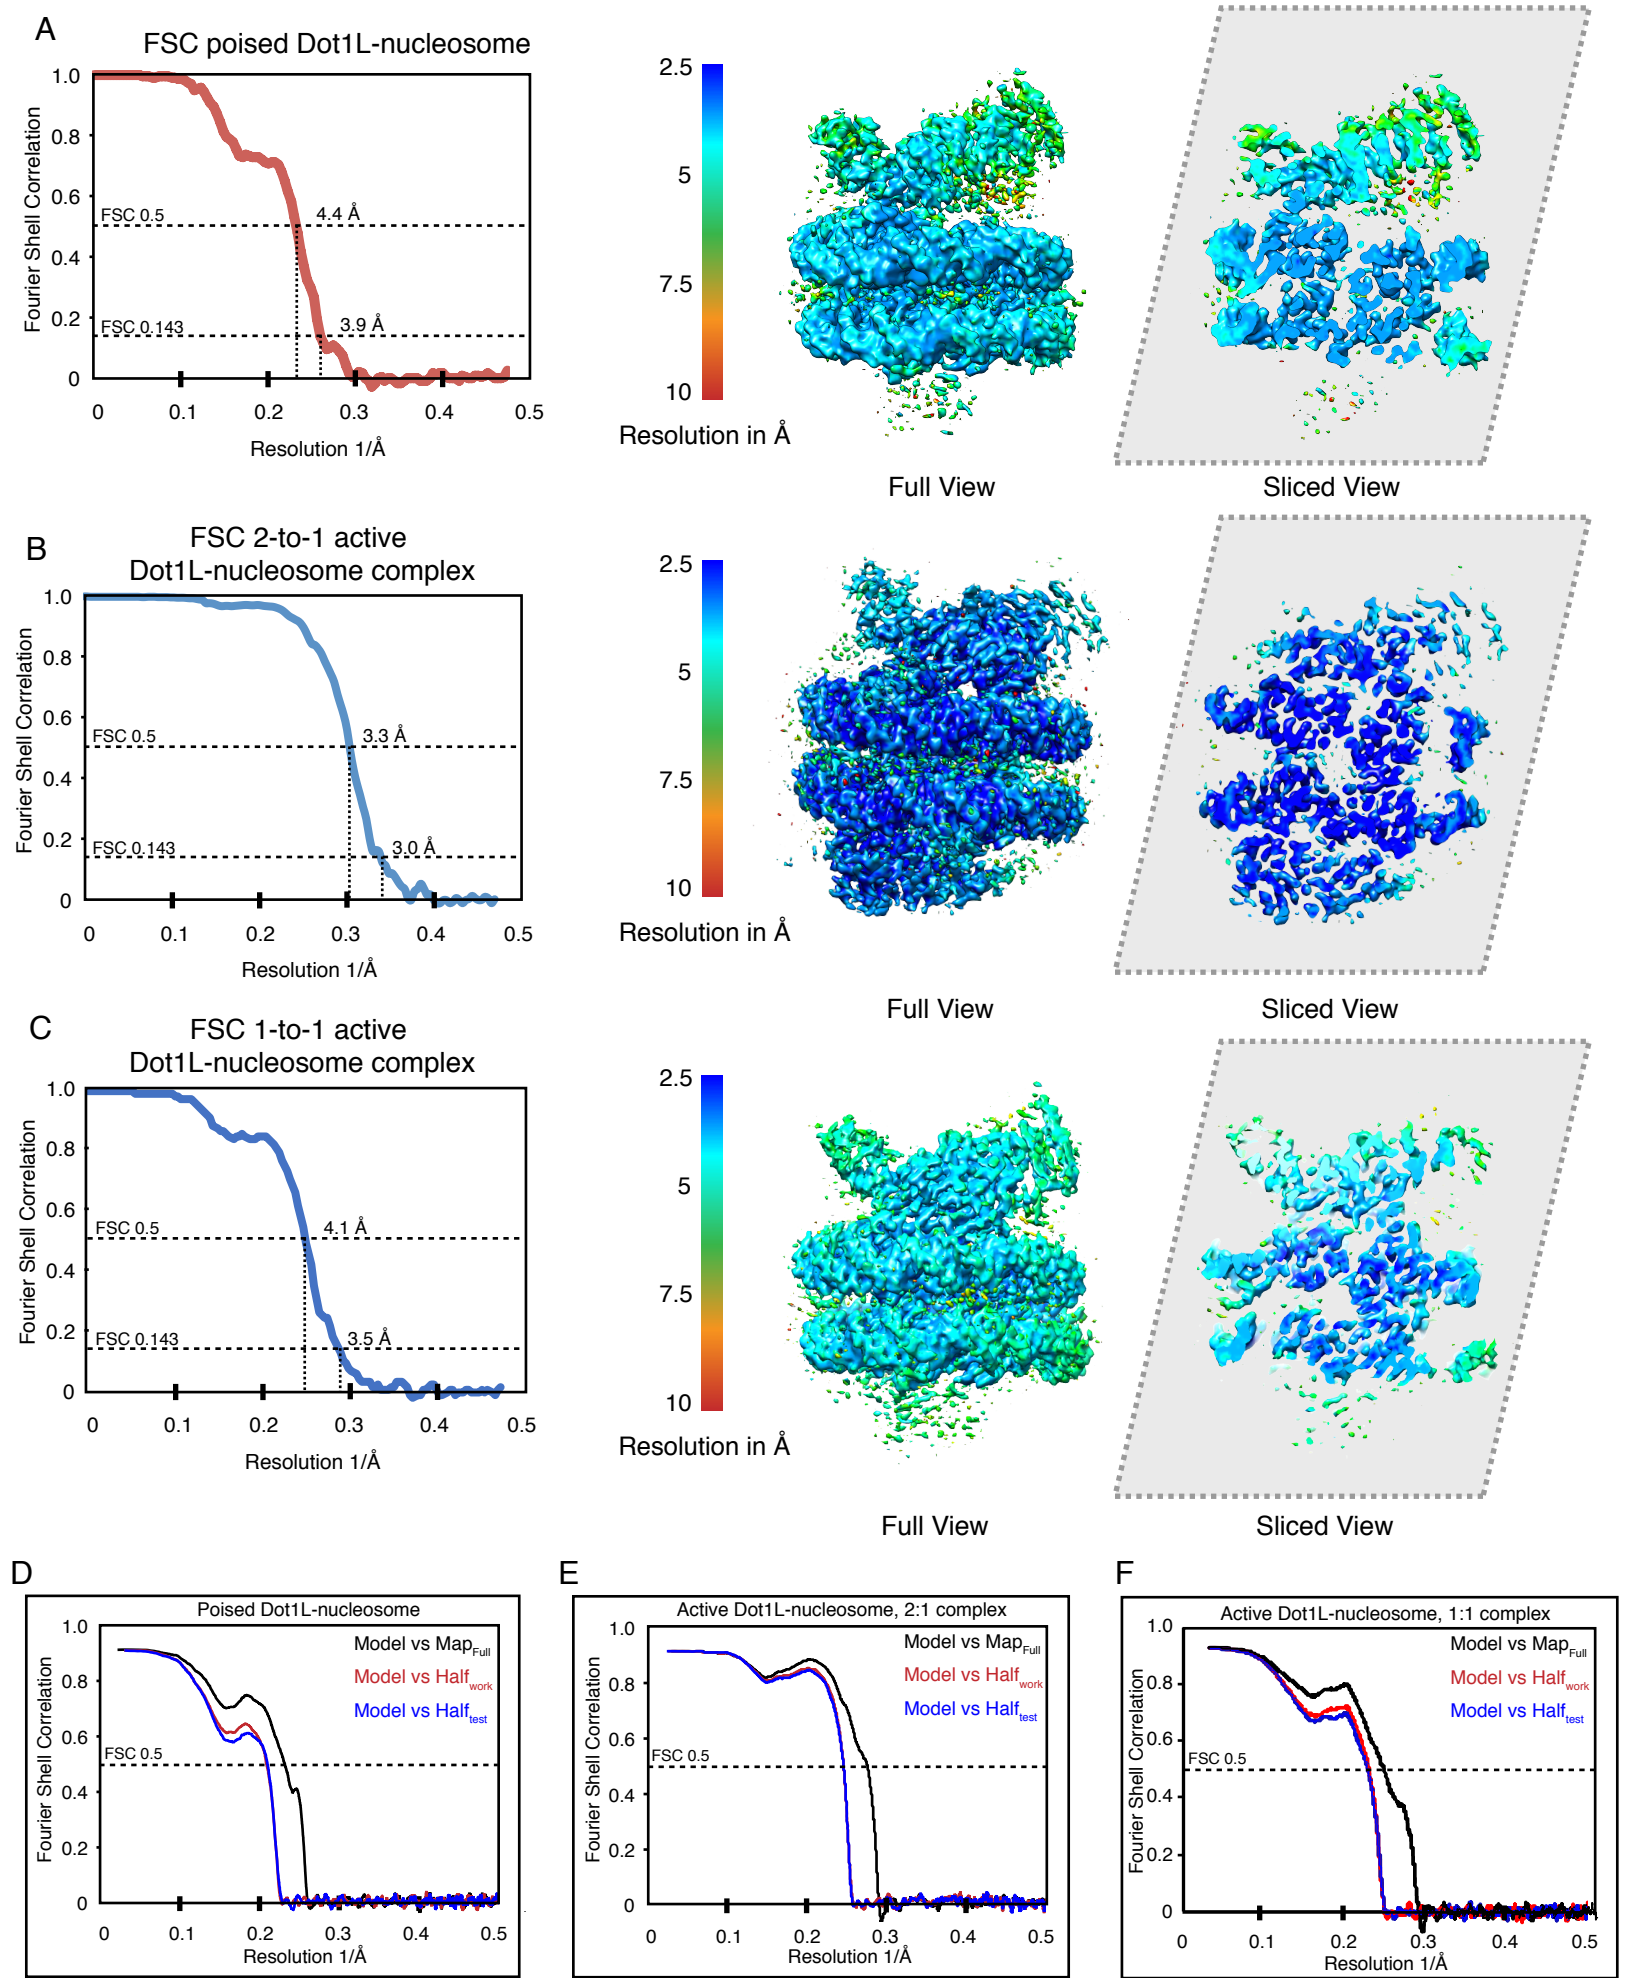

Supplement: NIHMS1521535-supplement-3.pdf [file NIHMS1521535-supplement-3.pdf]

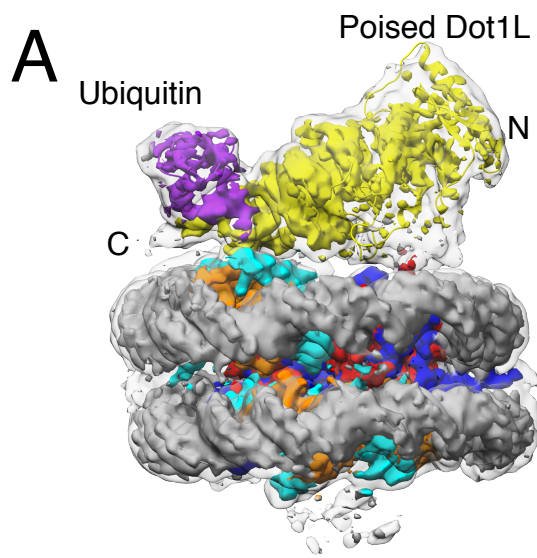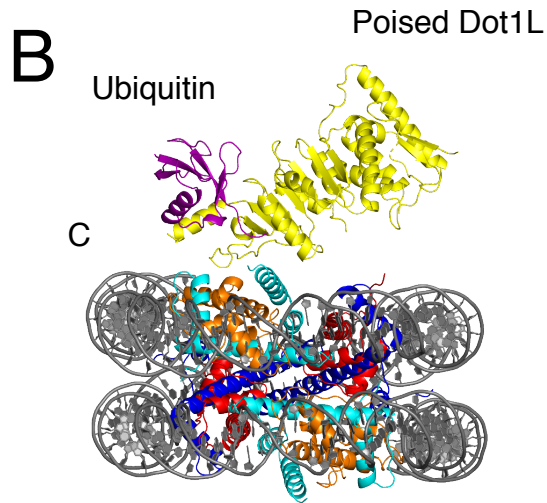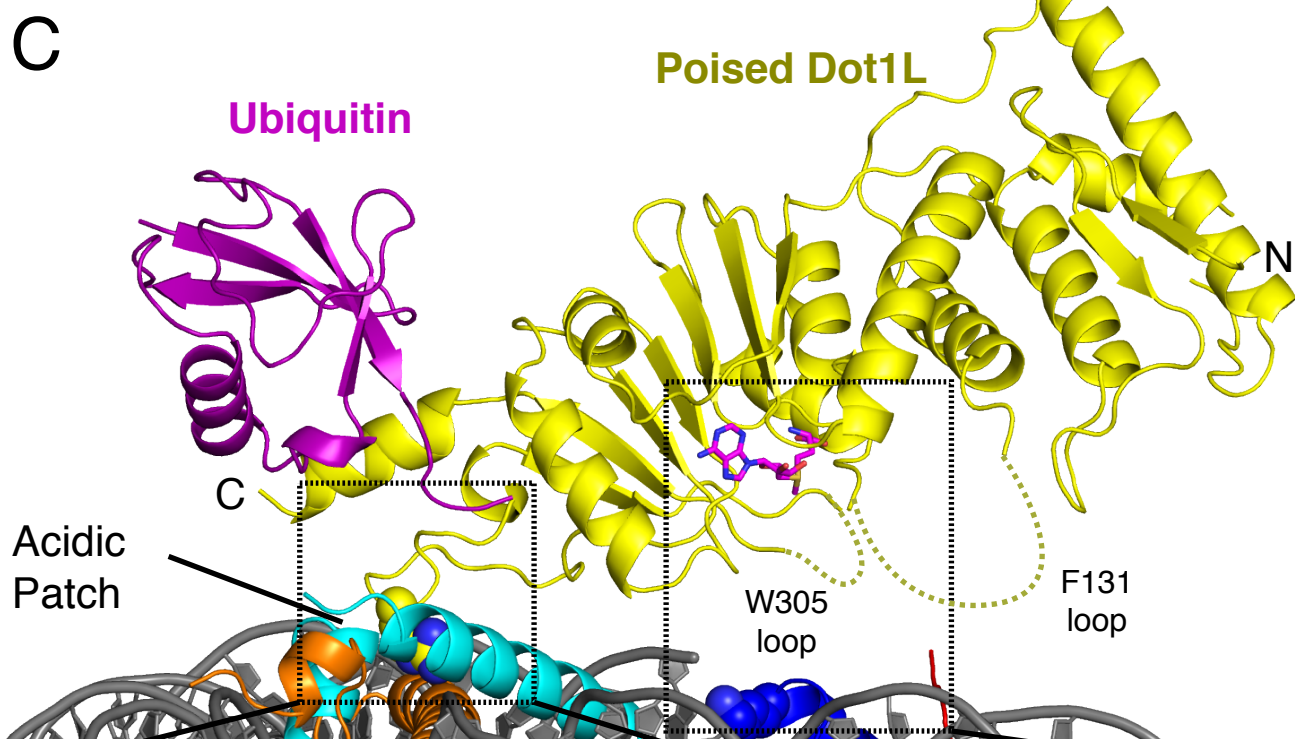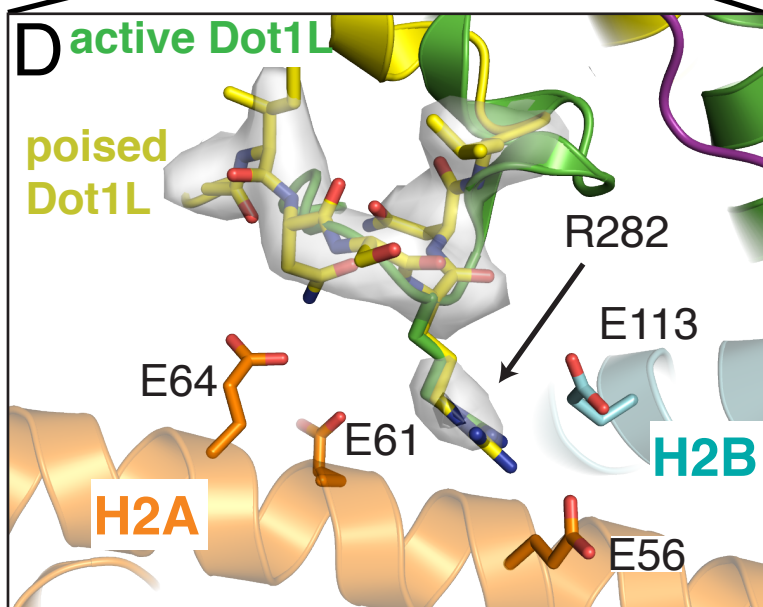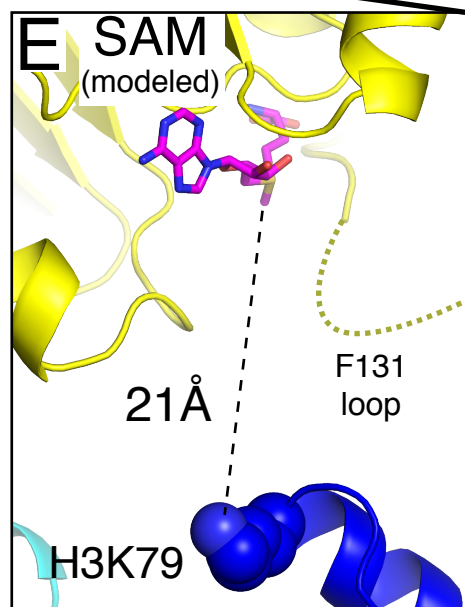

Supplement: NIHMS1521535-supplement-4.pdf [file NIHMS1521535-supplement-4.pdf]

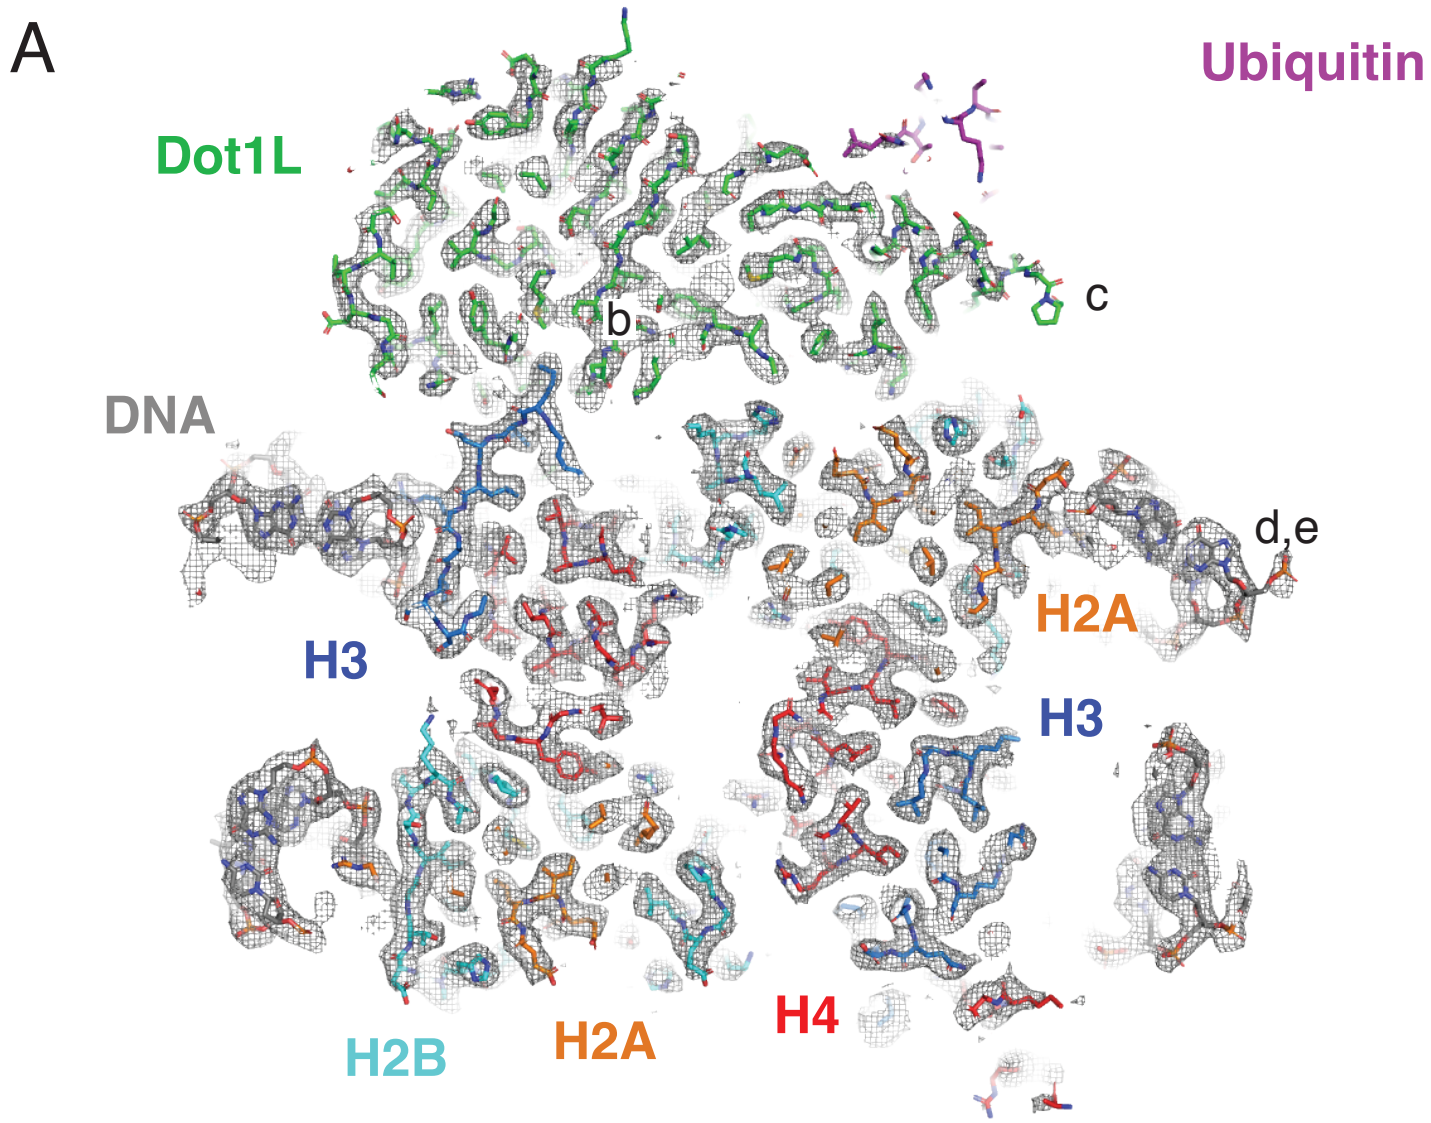

Dot1L-Ub  
interaction

SAM cofactor

DNA

DNA

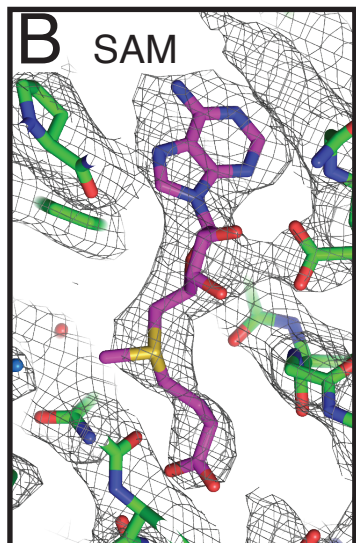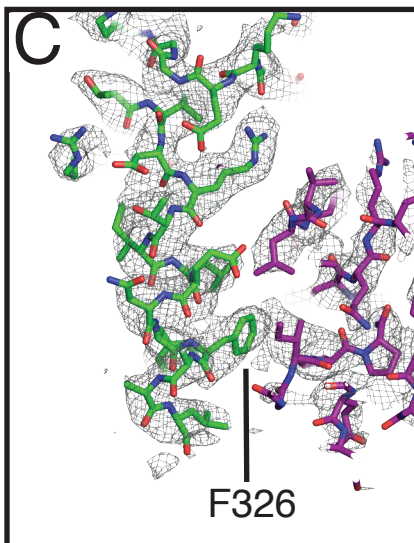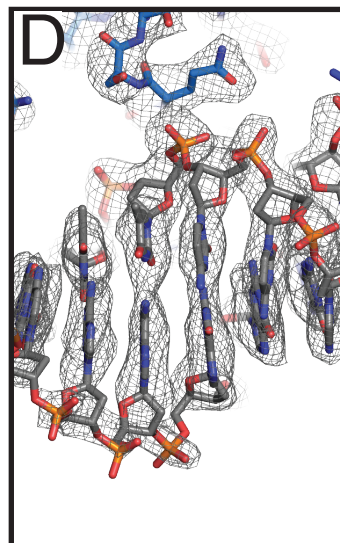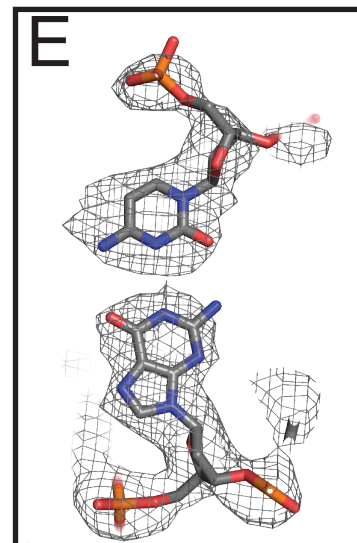

Supplement: NIHMS1521535-supplement-5.pdf [file NIHMS1521535-supplement-5.pdf]

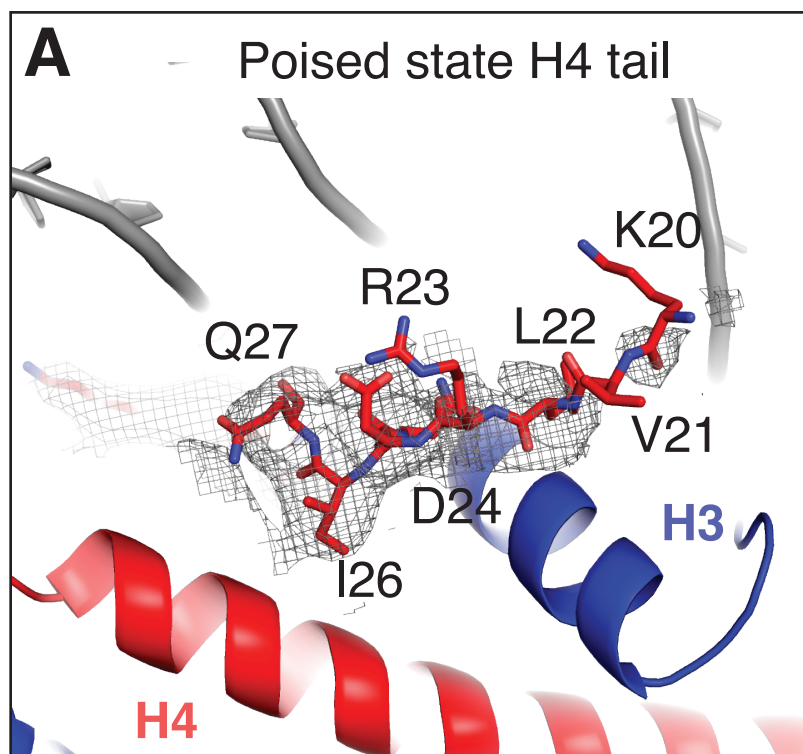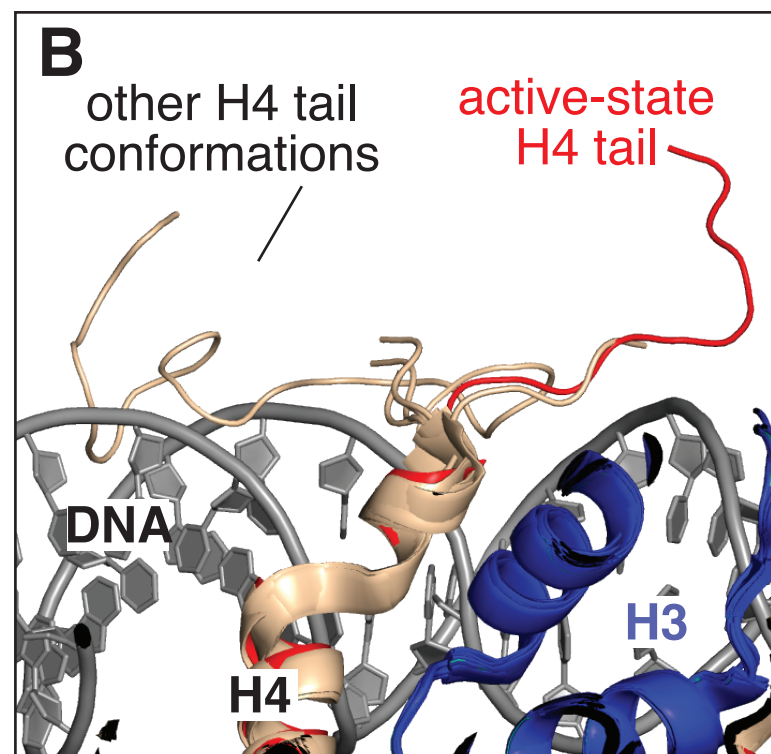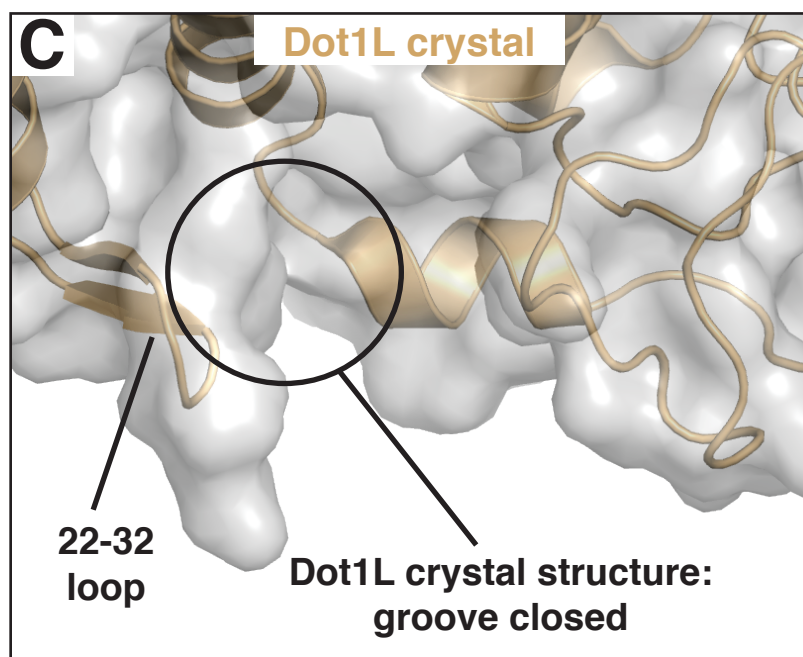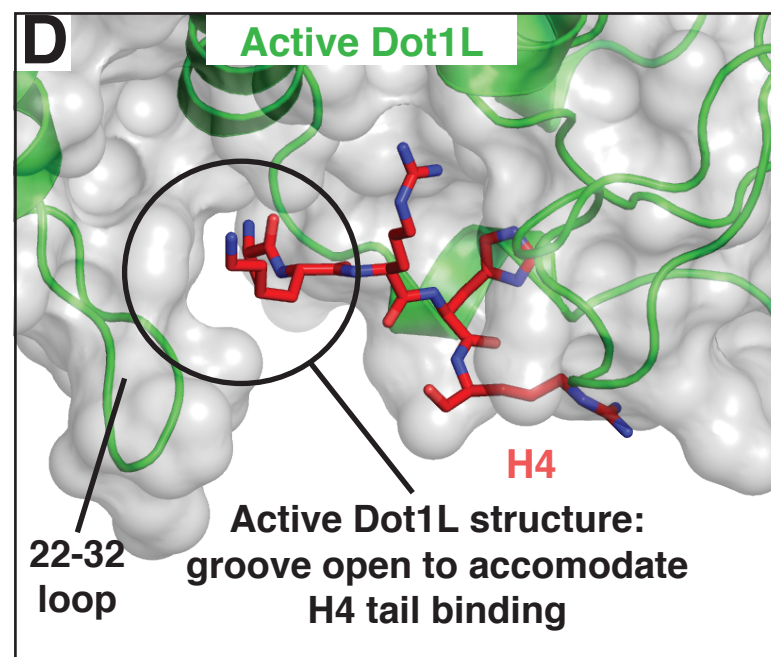

Supplement: NIHMS1521535-supplement-6.pdf [file NIHMS1521535-supplement-6.pdf]

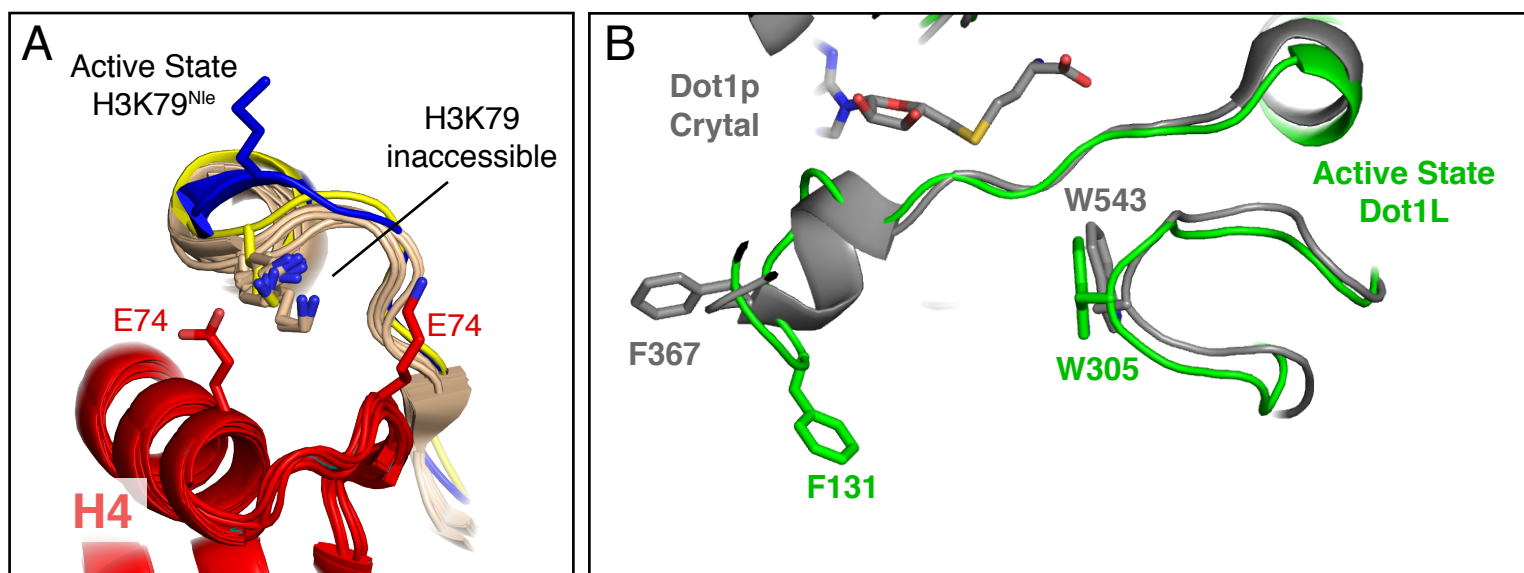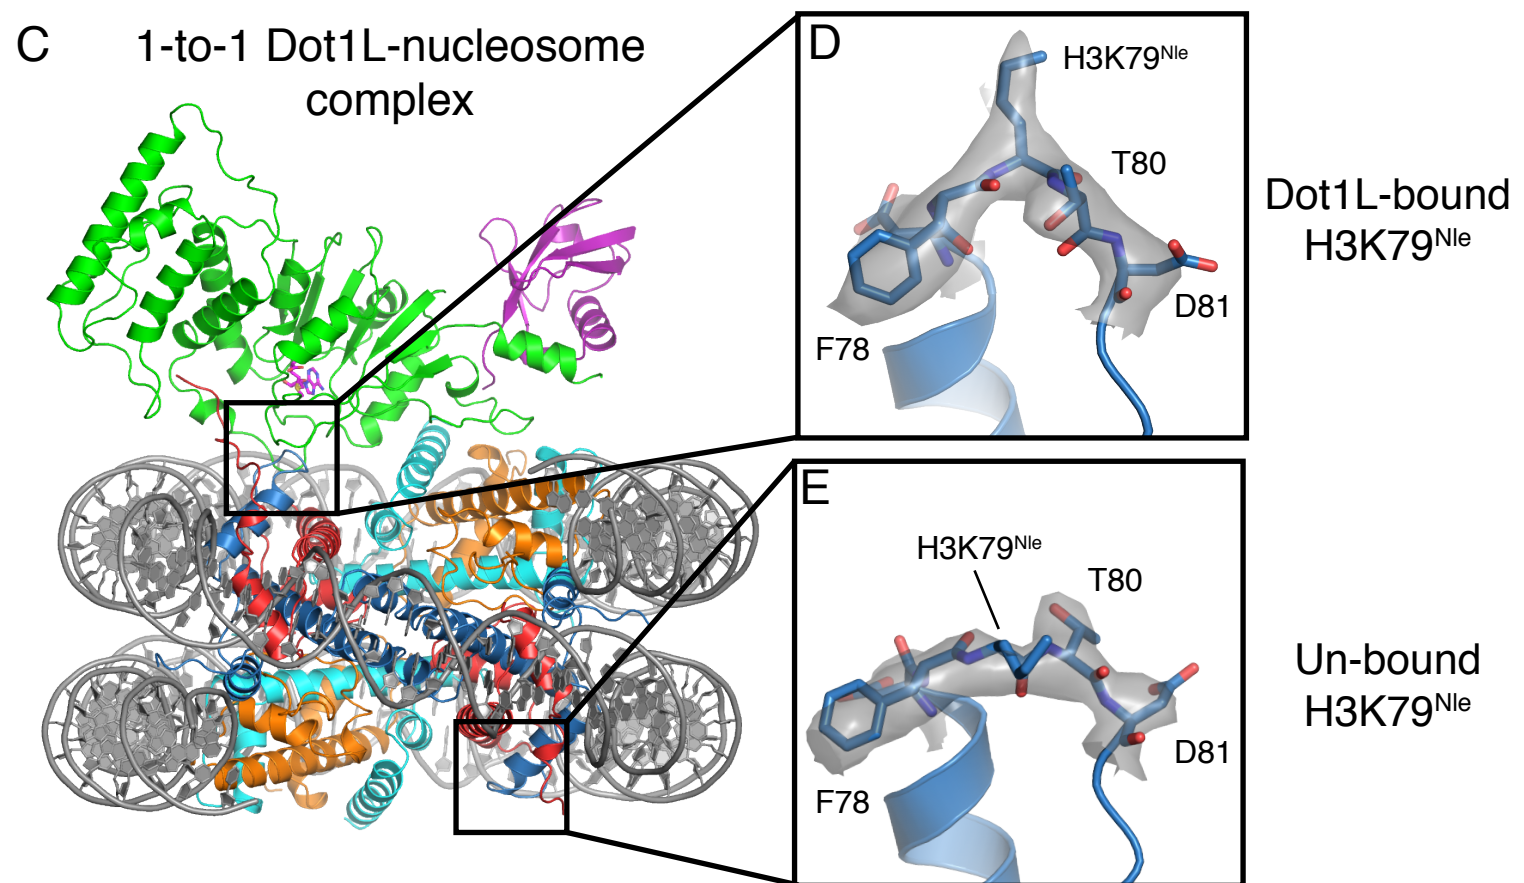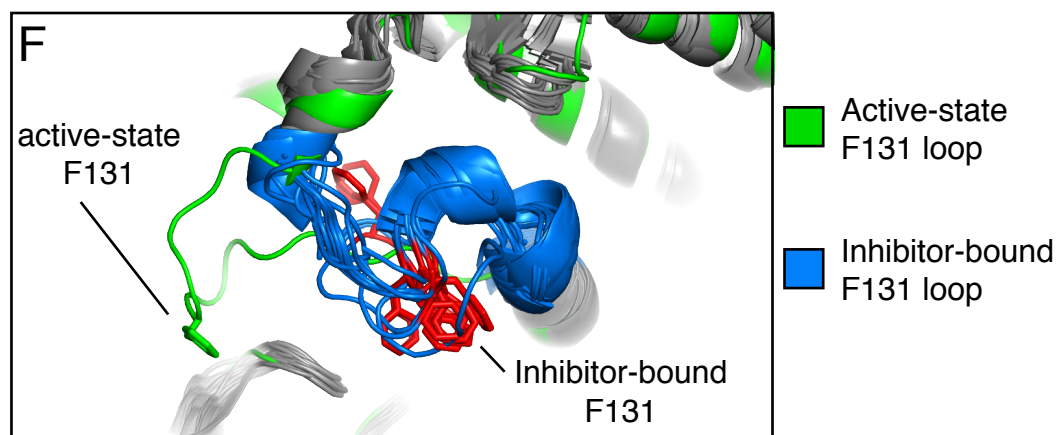

Supplement: NIHMS1521535-supplement-7.pdf [file NIHMS1521535-supplement-7.pdf]
